# Supplementary material for: Through-space magnetic response of noble gases
Source: Royal Society of Chemistry journal article supplement (doi:10.1039/d5cp03897a), 2025-12-12
Supplement: d5cp03897a1.pdf [file d5cp03897a1.pdf]

## Through-Space Magnetic Response of Noble-gases

Alvaro Muñoz-Castro<sup>a\*</sup>

<sup>a</sup>*Facultad de Ingeniería, Universidad San Sebastián, Bellavista 7, Santiago, 8420524, Chile.*

### Content

Figure S1. Through-space magnetic response properties induced for He **at  $\pm 0.5$  ppm** isosurface. Page S1

Figure S2. Contour plot representation of the through-space magnetic response properties induced for noble gases (He-Rn), Page S2

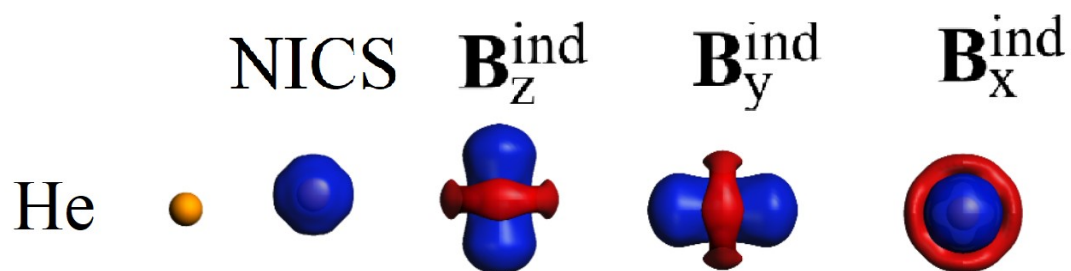

Figure S1. Through-space magnetic response properties induced for He at  $\pm 0.5$  ppm isosurface, denoting the orientation-averaged (NICS) term, and under different orientations of the external field.

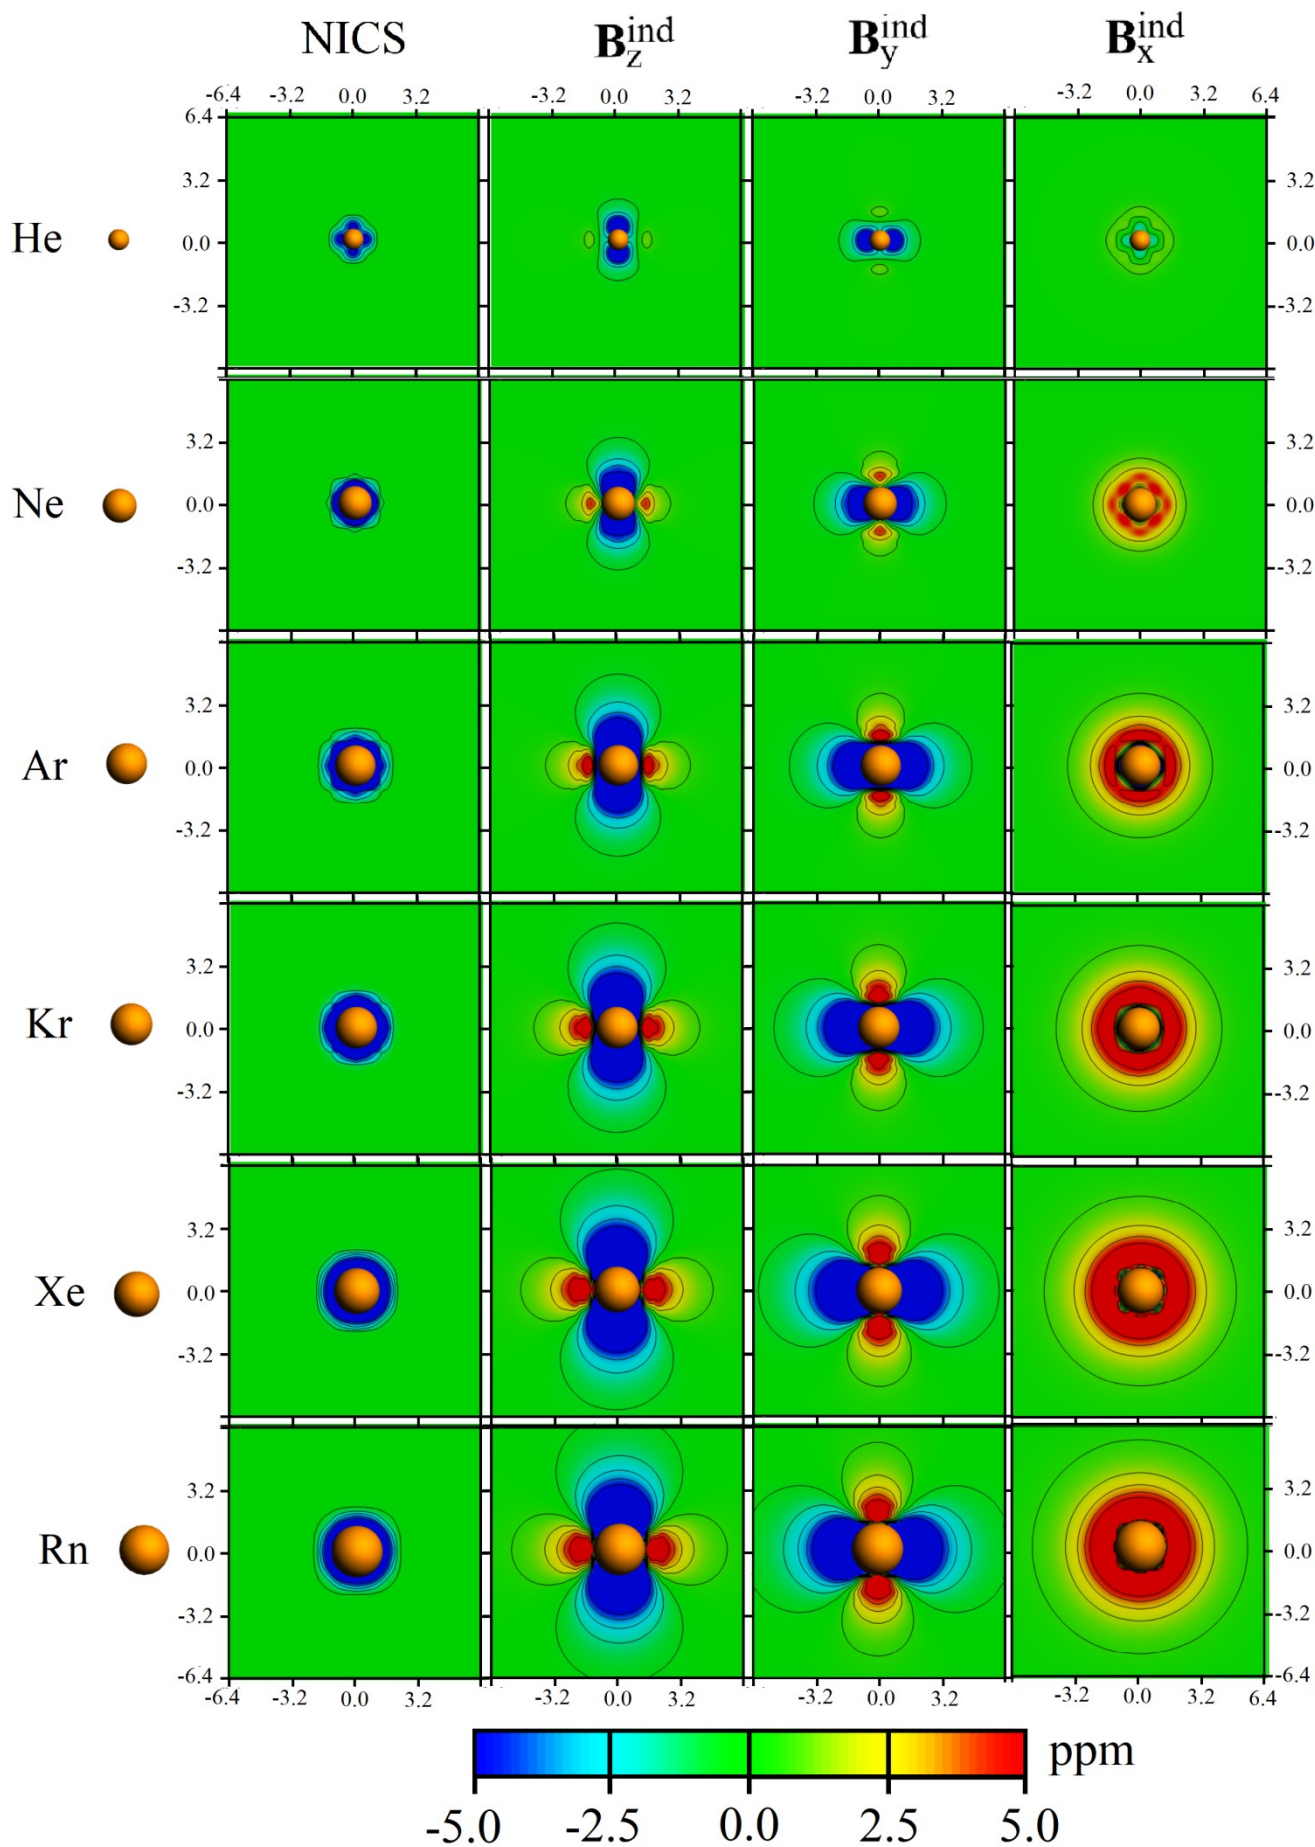

Figure S2. Contour plot representation of the through-space magnetic response properties induced for noble gases (He-Rn), denoting the orientation-averaged (NICS) term, and under different orientations of the external field. Isosurface values set to 3.0 ppm, with shielding (blue) and deshielding (red) colors. Distances given in Angstroms from the noble gas position.
